# Supplementary material for: Scale dependence in hydrodynamic regime for jumping on water
Source: PubMed Central journal article supplement (PMC10020434; doi:10.1038/s41467-023-37119-2), 2023-03-17
Supplement: 41467_2023_37119_MOESM3_ESM.pdf [file 41467_2023_37119_MOESM3_ESM.pdf]

## Description of Additional Supplementary Files

**Title:** Supplementary Movie 1

**Description:** Vertical, directional, and obstacle jump on the water surface.

This video shows the jumping robots designed with a high Weber number ( $We = 131$ ) overcoming the obstacle (height = 220 mm), jumping up to 545 mm in the vertical direction, and jumping forward 556 mm in the lateral direction.

**Title:** Supplementary Movie 2

**Description:** Comparison of jumping robots with various Weber numbers

This video shows the difference in jumping performance and sequences during take-off of jumping robots with different Weber numbers. The robots are designed to have a specific range of Weber numbers ( $1 < We < 10$ ,  $10 < We < 100$ ,  $100 < We$ ) through the shape of the legs and the size of the robots.
